# Supplementary material for: Association between Dietary Cholesterol and Their Food Sources and Risk for Hypercholesterolemia: The 2012–2016 Korea National Health and Nutrition Examination Survey
Source: PubMed Central journal article supplement (PMC6520795; doi:10.3390/nu11040846), 2019-04-15
Supplement: nutrients-11-00846-s001.pdf [file nutrients-11-00846-s001.pdf]

**Supplementary Material:**

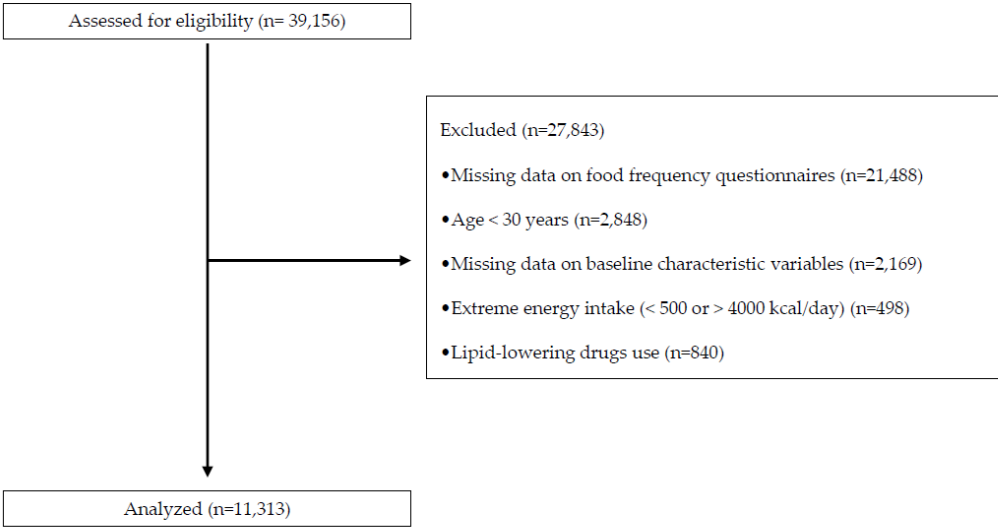

**Figure S1.** Flowchart of participants’ inclusion and exclusion.
